# Supplementary material for: Glycerol carbonate as a fuel additive for a sustainable future
Source: Royal Society of Chemistry journal article supplement (doi:10.1039/c8se00207j), 2018-01-01
Supplement: c8se00207j1.pdf [file c8se00207j1.pdf]

## Supplementary Materials

### Glycerol Carbonate as Fuel Additive for Sustainable Future

Milán Szöri<sup>1</sup>, Binod Raj Giri<sup>2,\*</sup>, Zhandong Wang<sup>2</sup>, Alaaedin E. Dawood<sup>2</sup>, Béla Viskolcz<sup>1</sup> and  
Aamir Farooq<sup>2,\*</sup>

<sup>1</sup>*King Abdullah University of Science and Technology (KAUST), Clean Combustion Research Center, Division of Physical Sciences and Engineering, Thuwal 23955-6900, Saudi Arabia*

<sup>2</sup>*Institute of Chemistry, Faculty of Materials Science and Engineering, University of Miskolc, Egyetemváros A/4, H-3515 Miskolc, Hungary*

\*Corresponding authors e-mail: [Binod.Giri@kaust.edu.sa](mailto:Binod.Giri@kaust.edu.sa)  
[Aamir.Farooq@kaust.edu.sa](mailto:Aamir.Farooq@kaust.edu.sa)

**Figure 1S** Reaction scheme showing various reaction pathways for the decomposition of glycerol carbonate. G4 zero-point corrected energies are provided for each channels. The barrier heights ( $E_0$ ) for the major channels are identified with red color.

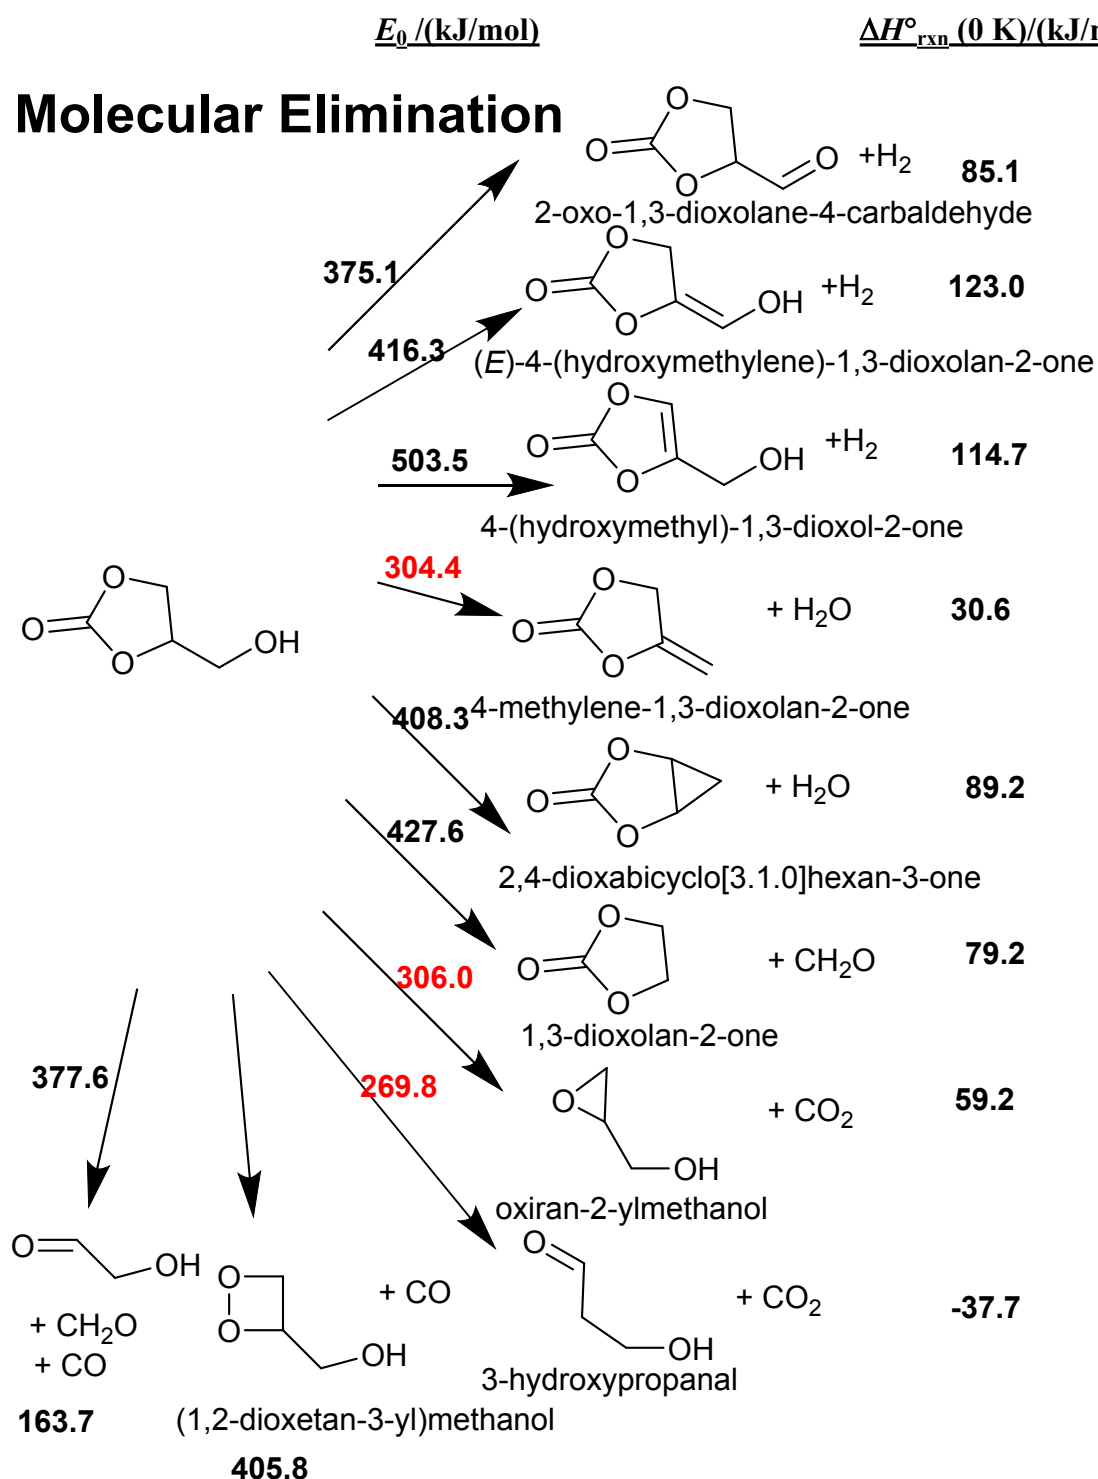

# Radical Forming Channels

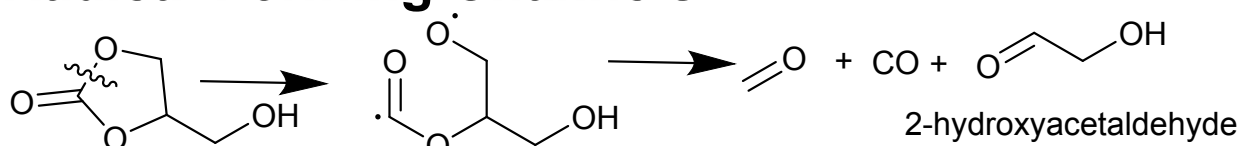

401.8

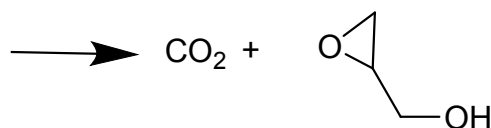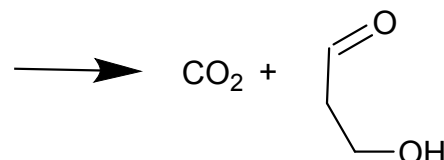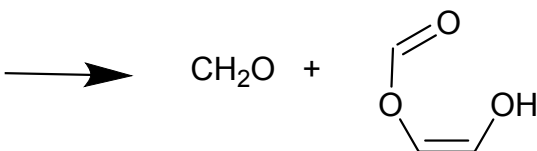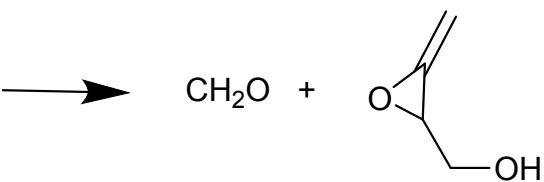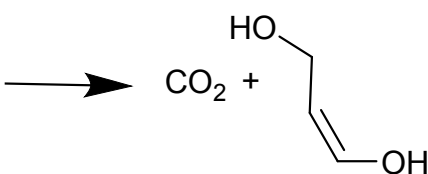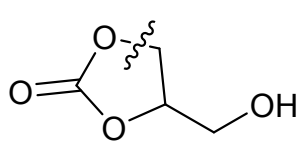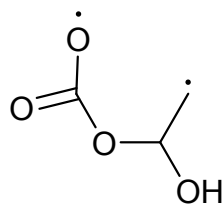

337.6

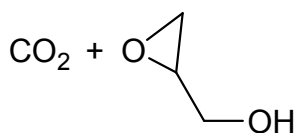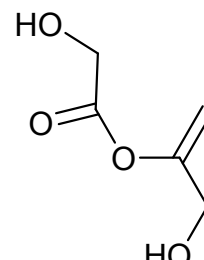

3-hydroxyprop-1-en-2-yl 2-hydroxyacetate

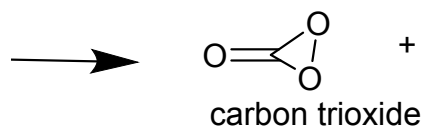

carbon trioxide

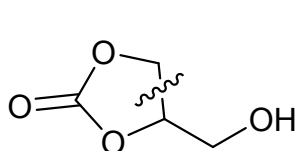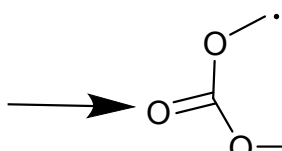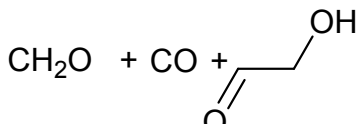

**Glycerol Carbonate  
(GC)**

| <i>T</i> /K | <b>J·K<sup>-1</sup> mol<sup>-1</sup></b> |                       |                     | <b>kJ·mol<sup>-1</sup></b>                       |                |                | <b>log K<sub>f</sub></b> |
|-------------|------------------------------------------|-----------------------|---------------------|--------------------------------------------------|----------------|----------------|--------------------------|
|             | <i>C<sub>p</sub></i> <sup>o</sup>        | <i>S</i> <sup>o</sup> | $-[G^o-H^o(T_r)]/T$ | <i>H-H</i> <sup>o</sup> ( <i>T<sub>r</sub></i> ) | $\Delta_f H^o$ | $\Delta_f G^o$ |                          |
| 0           | 0                                        | 0                     | inf                 | -21.806                                          | -677.735       | -677.735       | inf                      |
| 100         | 59.335                                   | 267.729               | 440.947             | -17.322                                          | -688.296       | -649.807       | 339.424                  |
| 200         | 86.734                                   | 317.081               | 367.314             | -10.047                                          | -696.229       | -608.138       | 158.829                  |
| 298.15      | 118.608                                  | 357.528               | 357.528             | 0                                                | -702.9         | -563.346       | 98.696                   |
| 300         | 119.232                                  | 358.263               | 357.53              | 0.22                                             | -703.011       | -562.569       | 97.952                   |
| 400         | 151.734                                  | 397.094               | 362.605             | 13.796                                           | -708.187       | -514.928       | 67.243                   |
| 500         | 179.504                                  | 434.039               | 373.231             | 30.404                                           | -711.77        | -466.168       | 48.7                     |
| 600         | 201.953                                  | 468.826               | 386.296             | 49.518                                           | -714.075       | -416.813       | 36.287                   |
| 700         | 220.04                                   | 501.364               | 400.436             | 70.649                                           | -715.36        | -367.152       | 27.397                   |
| 800         | 234.807                                  | 531.742               | 414.973             | 93.416                                           | -715.808       | -317.373       | 20.722                   |
| 900         | 247.043                                  | 560.127               | 429.541             | 117.527                                          | -715.571       | -267.574       | 15.53                    |
| 1000        | 257.302                                  | 586.702               | 443.943             | 142.759                                          | -714.767       | -217.837       | 11.379                   |
| 1100        | 265.981                                  | 611.643               | 458.067             | 168.934                                          | -713.503       | -168.201       | 7.987                    |
| 1200        | 273.371                                  | 635.112               | 471.852             | 195.912                                          | -711.861       | -118.698       | 5.167                    |
| 1300        | 279.7                                    | 657.25                | 485.27              | 223.573                                          | -709.925       | -69.345        | 2.786                    |
| 1400        | 285.147                                  | 678.182               | 498.309             | 251.822                                          | -707.754       | -20.142        | 0.752                    |
| 1500        | 289.856                                  | 698.02                | 510.967             | 280.578                                          | -705.402       | 28.885         | -1.006                   |
| 1600        | 293.945                                  | 716.86                | 523.252             | 309.773                                          | -702.914       | 77.761         | -2.539                   |
| 1700        | 297.511                                  | 734.79                | 535.172             | 339.35                                           | -700.331       | 126.47         | -3.886                   |
| 1800        | 300.634                                  | 751.885               | 546.741             | 369.26                                           | -697.681       | 175.033        | -5.079                   |
| 1900        | 303.379                                  | 768.215               | 557.971             | 399.464                                          | -694.989       | 223.442        | -6.143                   |
| 2000        | 305.803                                  | 783.839               | 568.876             | 429.925                                          | -692.278       | 271.709        | -7.096                   |
| 2100        | 307.951                                  | 798.812               | 579.472             | 460.615                                          | -689.574       | 319.838        | -7.956                   |
| 2200        | 309.861                                  | 813.183               | 589.771             | 491.508                                          | -686.882       | 367.845        | -8.734                   |
| 2300        | 311.566                                  | 826.995               | 599.786             | 522.581                                          | -684.216       | 415.734        | -9.442                   |
| 2400        | 313.093                                  | 840.288               | 609.532             | 553.815                                          | -681.591       | 463.497        | -10.088                  |
| 2500        | 314.464                                  | 853.098               | 619.02              | 585.194                                          | -679.012       | 511.155        | -10.68                   |
| 2600        | 315.701                                  | 865.456               | 628.262             | 616.703                                          | -676.489       | 558.711        | -11.225                  |
| 2700        | 316.818                                  | 877.392               | 637.269             | 648.33                                           | -674.024       | 606.17         | -11.727                  |
| 2800        | 317.832                                  | 888.932               | 646.052             | 680.063                                          | -671.626       | 653.542        | -12.192                  |
| 2900        | 318.753                                  | 900.102               | 654.621             | 711.893                                          | -669.3         | 700.827        | -12.623                  |
| 3000        | 319.592                                  | 910.922               | 662.985             | 743.811                                          | -667.043       | 748.038        | -13.024                  |
| 3100        | 320.359                                  | 921.414               | 671.153             | 775.809                                          | -664.869       | 795.162        | -13.398                  |
| 3200        | 321.061                                  | 931.596               | 679.134             | 807.881                                          | -662.771       | 842.234        | -13.748                  |
| 3300        | 321.706                                  | 941.486               | 686.935             | 840.02                                           | -660.754       | 889.229        | -14.075                  |
| 3400        | 322.299                                  | 951.099               | 694.563             | 872.22                                           | -658.822       | 936.174        | -14.383                  |
| 3500        | 322.846                                  | 960.449               | 702.027             | 904.478                                          | -656.973       | 983.067        | -14.671                  |
| 3600        | 323.351                                  | 969.551               | 709.333             | 936.788                                          | -655.21        | 1029.893       | -14.943                  |
| 3700        | 323.818                                  | 978.417               | 716.486             | 969.147                                          | -653.531       | 1076.678       | -15.2                    |
| 3800        | 324.251                                  | 987.059               | 723.493             | 1001.55                                          | -651.947       | 1123.422       | -15.443                  |
| 3900        | 324.653                                  | 995.487               | 730.36              | 1033.996                                         | -650.446       | 1170.116       | -15.672                  |
| 4000        | 325.027                                  | 1003.711              | 737.091             | 1066.48                                          | -649.036       | 1216.772       | -15.889                  |
| 4100        | 325.376                                  | 1011.741              | 743.692             | 1099.001                                         | -647.72        | 1263.414       | -16.096                  |
| 4200        | 325.701                                  | 1019.586              | 750.168             | 1131.555                                         | -646.493       | 1310.008       | -16.292                  |

|      |         |          |         |          |          |          |         |
|------|---------|----------|---------|----------|----------|----------|---------|
| 4300 | 326.005 | 1027.253 | 756.523 | 1164.14  | -645.36  | 1356.58  | -16.479 |
| 4400 | 326.29  | 1034.751 | 762.762 | 1196.755 | -644.318 | 1403.127 | -16.657 |
| 4500 | 326.556 | 1042.087 | 768.888 | 1229.397 | -643.367 | 1449.632 | -16.827 |
| 4600 | 326.807 | 1049.267 | 774.905 | 1262.066 | -642.514 | 1496.148 | -16.989 |
| 4700 | 327.042 | 1056.298 | 780.818 | 1294.758 | -641.758 | 1542.635 | -17.144 |
| 4800 | 327.263 | 1063.186 | 786.629 | 1327.474 | -641.089 | 1589.101 | -17.293 |
| 4900 | 327.471 | 1069.936 | 792.342 | 1360.21  | -640.525 | 1635.572 | -17.435 |
| 5000 | 327.667 | 1076.554 | 797.96  | 1392.967 | -640.047 | 1682.009 | -17.572 |
| 5100 | 327.853 | 1083.044 | 803.487 | 1425.744 | -639.671 | 1728.45  | -17.703 |
| 5200 | 328.028 | 1089.412 | 808.924 | 1458.538 | -639.385 | 1774.858 | -17.829 |
| 5300 | 328.193 | 1095.662 | 814.276 | 1491.349 | -639.201 | 1821.296 | -17.95  |
| 5400 | 328.35  | 1101.798 | 819.543 | 1524.176 | -639.116 | 1867.709 | -18.067 |
| 5500 | 328.499 | 1107.824 | 824.73  | 1557.019 | -639.118 | 1914.131 | -18.179 |
| 5600 | 328.64  | 1113.745 | 829.838 | 1589.876 | -639.219 | 1960.558 | -18.287 |
| 5700 | 328.773 | 1119.563 | 834.87  | 1622.746 | -639.417 | 2006.986 | -18.392 |
| 5800 | 328.901 | 1125.282 | 839.828 | 1655.63  | -639.713 | 2053.426 | -18.493 |
| 5900 | 329.022 | 1130.905 | 844.714 | 1688.526 | -640.098 | 2099.84  | -18.591 |
| 6000 | 329.137 | 1136.436 | 849.53  | 1721.434 | -640.585 | 2146.305 | -18.685 |

Enthalpy Reference Temperature =  $T_r = 298.15$  K

Standard State Pressure =  $p^\circ = 0.1$  MPa

**P1a**

| $T/K$  | $\text{J}\cdot\text{K}^{-1}\cdot\text{mol}^{-1}$ |           |                               | $\text{kJ}\cdot\text{mol}^{-1}$ |                    |                    | $\log K_f$ |
|--------|--------------------------------------------------|-----------|-------------------------------|---------------------------------|--------------------|--------------------|------------|
|        | $C_p^\circ$                                      | $S^\circ$ | $-[G^\circ - H^\circ(T_r)]/T$ | $H - H^\circ(T_r)$              | $\Delta_f H^\circ$ | $\Delta_f G^\circ$ |            |
| 0      | 0                                                | 0         | inf                           | -17.545                         | -323.308           | -323.308           | inf        |
| 100    | 49.312                                           | 240.771   | 377.185                       | -13.641                         | -331.485           | -307.727           | 160.74     |
| 200    | 68.542                                           | 280.864   | 319.605                       | -7.748                          | -337.563           | -281.542           | 73.531     |
| 298.15 | 89.801                                           | 312.102   | 312.102                       | 0                               | -343               | -252.798           | 44.289     |
| 300    | 90.222                                           | 312.659   | 312.104                       | 0.167                           | -343.094           | -252.308           | 43.931     |
| 400    | 112.566                                          | 341.708   | 315.913                       | 10.318                          | -347.701           | -221.321           | 28.902     |
| 500    | 132.371                                          | 369.014   | 323.831                       | 22.592                          | -351.233           | -189.296           | 19.776     |
| 600    | 148.941                                          | 394.66    | 333.521                       | 36.683                          | -353.823           | -156.651           | 13.638     |
| 700    | 162.728                                          | 418.686   | 343.99                        | 52.287                          | -355.607           | -123.636           | 9.226      |
| 800    | 174.312                                          | 441.193   | 354.749                       | 69.155                          | -356.697           | -90.419            | 5.904      |
| 900    | 184.145                                          | 462.307   | 365.539                       | 87.091                          | -357.194           | -57.096            | 3.314      |
| 1000   | 192.553                                          | 482.155   | 376.219                       | 105.937                         | -357.191           | -23.75             | 1.241      |
| 1100   | 199.775                                          | 500.855   | 386.707                       | 125.562                         | -356.774           | 9.578              | -0.455     |
| 1200   | 206.001                                          | 518.511   | 396.962                       | 145.859                         | -356.013           | 42.851             | -1.865     |
| 1300   | 211.384                                          | 535.218   | 406.961                       | 166.734                         | -354.981           | 76.049             | -3.056     |
| 1400   | 216.051                                          | 551.058   | 416.693                       | 188.112                         | -353.728           | 109.166            | -4.073     |
| 1500   | 220.111                                          | 566.106   | 426.156                       | 209.924                         | -352.304           | 142.175            | -4.951     |
| 1600   | 223.653                                          | 580.427   | 435.354                       | 232.117                         | -350.746           | 175.094            | -5.716     |
| 1700   | 226.755                                          | 594.081   | 444.292                       | 254.64                          | -349.093           | 207.905            | -6.388     |
| 1800   | 229.48                                           | 607.121   | 452.979                       | 277.455                         | -347.366           | 240.623            | -6.983     |
| 1900   | 231.882                                          | 619.594   | 461.422                       | 300.526                         | -345.588           | 273.24             | -7.512     |
| 2000   | 234.008                                          | 631.543   | 469.632                       | 323.822                         | -343.781           | 305.763            | -7.986     |
| 2100   | 235.895                                          | 643.007   | 477.617                       | 347.319                         | -341.965           | 338.193            | -8.412     |
| 2200   | 237.577                                          | 654.02    | 485.386                       | 370.994                         | -340.146           | 370.539            | -8.798     |

|      |         |         |         |          |          |          |         |
|------|---------|---------|---------|----------|----------|----------|---------|
| 2300 | 239.079 | 664.615 | 492.95  | 394.829  | -338.334 | 402.807  | -9.148  |
| 2400 | 240.427 | 674.819 | 500.317 | 418.805  | -336.544 | 434.99   | -9.467  |
| 2500 | 241.639 | 684.658 | 507.495 | 442.909  | -334.78  | 467.101  | -9.76   |
| 2600 | 242.732 | 694.157 | 514.492 | 467.129  | -333.05  | 499.139  | -10.028 |
| 2700 | 243.722 | 703.337 | 521.318 | 491.452  | -331.358 | 531.113  | -10.275 |
| 2800 | 244.619 | 712.217 | 527.978 | 515.87   | -329.709 | 563.028  | -10.503 |
| 2900 | 245.436 | 720.815 | 534.48  | 540.374  | -328.11  | 594.884  | -10.715 |
| 3000 | 246.18  | 729.149 | 540.831 | 564.955  | -326.559 | 626.685  | -10.912 |
| 3100 | 246.861 | 737.232 | 547.036 | 589.607  | -325.067 | 658.429  | -11.094 |
| 3200 | 247.484 | 745.08  | 553.103 | 614.325  | -323.629 | 690.139  | -11.265 |
| 3300 | 248.057 | 752.704 | 559.037 | 639.103  | -322.25  | 721.792  | -11.425 |
| 3400 | 248.584 | 760.117 | 564.842 | 663.935  | -320.933 | 753.414  | -11.575 |
| 3500 | 249.07  | 767.33  | 570.525 | 688.818  | -319.679 | 785      | -11.715 |
| 3600 | 249.519 | 774.353 | 576.09  | 713.748  | -318.488 | 816.539  | -11.848 |
| 3700 | 249.935 | 781.196 | 581.541 | 738.721  | -317.361 | 848.055  | -11.972 |
| 3800 | 250.32  | 787.866 | 586.883 | 763.734  | -316.307 | 879.538  | -12.09  |
| 3900 | 250.678 | 794.373 | 592.121 | 788.784  | -315.317 | 910.988  | -12.201 |
| 4000 | 251.011 | 800.724 | 597.257 | 813.868  | -314.397 | 942.417  | -12.307 |
| 4100 | 251.322 | 806.926 | 602.295 | 838.985  | -313.55  | 973.837  | -12.407 |
| 4200 | 251.611 | 812.985 | 607.24  | 864.132  | -312.772 | 1005.226 | -12.502 |
| 4300 | 251.882 | 818.909 | 612.094 | 889.307  | -312.068 | 1036.596 | -12.592 |
| 4400 | 252.136 | 824.703 | 616.86  | 914.508  | -311.435 | 1067.956 | -12.678 |
| 4500 | 252.373 | 830.372 | 621.542 | 939.734  | -310.873 | 1099.286 | -12.76  |
| 4600 | 252.596 | 835.921 | 626.142 | 964.982  | -310.389 | 1130.631 | -12.839 |
| 4700 | 252.806 | 841.356 | 630.664 | 990.252  | -309.981 | 1161.955 | -12.914 |
| 4800 | 253.003 | 846.68  | 635.109 | 1015.543 | -309.64  | 1193.265 | -12.985 |
| 4900 | 253.188 | 851.899 | 639.48  | 1040.852 | -309.381 | 1224.583 | -13.054 |
| 5000 | 253.364 | 857.016 | 643.78  | 1066.18  | -309.188 | 1255.881 | -13.12  |
| 5100 | 253.529 | 862.035 | 648.01  | 1091.525 | -309.075 | 1287.183 | -13.183 |
| 5200 | 253.685 | 866.959 | 652.174 | 1116.886 | -309.029 | 1318.465 | -13.244 |
| 5300 | 253.833 | 871.793 | 656.272 | 1142.262 | -309.061 | 1349.773 | -13.303 |
| 5400 | 253.973 | 876.539 | 660.307 | 1167.652 | -309.167 | 1381.063 | -13.359 |
| 5500 | 254.105 | 881.2   | 664.281 | 1193.056 | -309.337 | 1412.363 | -13.414 |
| 5600 | 254.231 | 885.78  | 668.196 | 1218.473 | -309.58  | 1443.676 | -13.466 |
| 5700 | 254.35  | 890.281 | 672.052 | 1243.902 | -309.892 | 1474.989 | -13.517 |
| 5800 | 254.464 | 894.705 | 675.853 | 1269.343 | -310.274 | 1506.311 | -13.566 |
| 5900 | 254.572 | 899.056 | 679.6   | 1294.794 | -310.719 | 1537.615 | -13.613 |
| 6000 | 254.674 | 903.336 | 683.293 | 1320.257 | -311.233 | 1568.966 | -13.659 |

Enthalpy Reference Temperature =  $T_r = 298.15 \text{ K}$

Standard State Pressure =  $p^\circ = 0.1 \text{ MPa}$

**P1b**

**$\text{J}\cdot\text{K}^{-1}\text{ mol}^{-1}$**

**$\text{kJ}\cdot\text{mol}^{-1}$**

| $T/K$  | $C_p^\circ$ | $S^\circ$ | $-[G^\circ - H^\circ(T_r)]/T$ | $H - H^\circ(T_r)$ | $\Delta_f H^\circ$ | $\Delta_f G^\circ$ | $\log K_f$ |
|--------|-------------|-----------|-------------------------------|--------------------|--------------------|--------------------|------------|
| 0      | 0           | 0         | inf                           | -16.232            | -225.095           | -225.095           | inf        |
| 100    | 44.196      | 235.844   | 361.412                       | -12.557            | -233.501           | -209.249           | 109.301    |
| 200    | 62.683      | 271.998   | 308.179                       | -7.236             | -240.151           | -182.357           | 47.627     |
| 298.15 | 85.471      | 301.133   | 301.133                       | 0                  | -246.1             | -152.627           | 26.74      |
| 300    | 85.931      | 301.663   | 301.135                       | 0.159              | -246.202           | -152.117           | 26.486     |
| 400    | 110.247     | 329.758   | 304.801                       | 9.983              | -251.136           | -119.976           | 15.667     |
| 500    | 131.346     | 356.7     | 312.508                       | 22.096             | -254.829           | -86.734            | 9.061      |
| 600    | 148.555     | 382.224   | 322.021                       | 36.121             | -257.485           | -52.851            | 4.601      |
| 700    | 162.583     | 406.212   | 332.353                       | 51.701             | -259.293           | -18.59             | 1.387      |
| 800    | 174.215     | 428.705   | 343.007                       | 68.558             | -260.394           | 15.876             | -1.037     |
| 900    | 184.018     | 449.806   | 353.713                       | 86.483             | -260.902           | 50.447             | -2.928     |
| 1000   | 192.373     | 469.638   | 364.324                       | 105.314            | -260.914           | 85.045             | -4.442     |
| 1100   | 199.546     | 488.318   | 374.755                       | 124.919            | -260.517           | 119.625            | -5.681     |
| 1200   | 205.733     | 505.952   | 384.961                       | 145.19             | -259.782           | 154.153            | -6.71      |
| 1300   | 211.089     | 522.636   | 394.915                       | 166.038            | -258.777           | 188.608            | -7.578     |
| 1400   | 215.741     | 538.454   | 404.608                       | 187.384            | -257.556           | 222.984            | -8.32      |
| 1500   | 219.794     | 553.48    | 414.036                       | 209.166            | -256.162           | 257.255            | -8.958     |
| 1600   | 223.337     | 567.781   | 423.202                       | 231.326            | -254.637           | 291.438            | -9.514     |
| 1700   | 226.443     | 581.416   | 432.111                       | 253.819            | -253.014           | 325.514            | -10.002    |
| 1800   | 229.176     | 594.438   | 440.77                        | 276.602            | -251.319           | 359.499            | -10.432    |
| 1900   | 231.588     | 606.895   | 449.188                       | 299.643            | -249.571           | 393.385            | -10.815    |
| 2000   | 233.725     | 618.829   | 457.374                       | 322.911            | -247.792           | 427.179            | -11.157    |
| 2100   | 235.625     | 630.28    | 465.337                       | 346.38             | -246.004           | 460.881            | -11.464    |
| 2200   | 237.318     | 641.281   | 473.086                       | 370.029            | -244.211           | 494.5              | -11.741    |
| 2300   | 238.833     | 651.864   | 480.63                        | 393.838            | -242.425           | 528.043            | -11.992    |
| 2400   | 240.192     | 662.058   | 487.978                       | 417.79             | -240.659           | 561.501            | -12.221    |
| 2500   | 241.416     | 671.888   | 495.139                       | 441.872            | -238.917           | 594.889            | -12.43     |
| 2600   | 242.52      | 681.378   | 502.121                       | 466.07             | -237.209           | 628.205            | -12.621    |
| 2700   | 243.52      | 690.55    | 508.931                       | 490.372            | -235.538           | 661.457            | -12.797    |
| 2800   | 244.427     | 699.423   | 515.577                       | 514.77             | -233.909           | 694.651            | -12.959    |
| 2900   | 245.253     | 708.015   | 522.065                       | 539.255            | -232.329           | 727.786            | -13.109    |
| 3000   | 246.006     | 716.342   | 528.403                       | 563.819            | -230.795           | 760.868            | -13.248    |
| 3100   | 246.695     | 724.42    | 534.596                       | 588.454            | -229.32            | 793.893            | -13.377    |
| 3200   | 247.327     | 732.263   | 540.652                       | 613.156            | -227.898           | 826.884            | -13.497    |
| 3300   | 247.907     | 739.882   | 546.574                       | 637.918            | -226.535           | 859.819            | -13.61     |
| 3400   | 248.441     | 747.291   | 552.369                       | 662.736            | -225.232           | 892.723            | -13.715    |
| 3500   | 248.933     | 754.5     | 558.042                       | 687.605            | -223.992           | 925.593            | -13.814    |
| 3600   | 249.388     | 761.519   | 563.597                       | 712.521            | -222.815           | 958.414            | -13.906    |
| 3700   | 249.81      | 768.358   | 569.039                       | 737.481            | -221.701           | 991.214            | -13.993    |
| 3800   | 250.201     | 775.025   | 574.372                       | 762.482            | -220.659           | 1023.981           | -14.076    |
| 3900   | 250.564     | 781.529   | 579.601                       | 787.52             | -219.681           | 1056.715           | -14.153    |
| 4000   | 250.902     | 787.877   | 584.729                       | 812.594            | -218.771           | 1089.429           | -14.226    |
| 4100   | 251.217     | 794.076   | 589.759                       | 837.7              | -217.935           | 1122.134           | -14.296    |
| 4200   | 251.511     | 800.134   | 594.696                       | 862.837            | -217.167           | 1154.808           | -14.362    |
| 4300   | 251.786     | 806.055   | 599.543                       | 888.002            | -216.473           | 1187.463           | -14.425    |
| 4400   | 252.043     | 811.847   | 604.303                       | 913.193            | -215.85            | 1220.109           | -14.485    |
| 4500   | 252.284     | 817.513   | 608.978                       | 938.41             | -215.297           | 1252.724           | -14.541    |

|      |         |         |         |          |          |          |         |
|------|---------|---------|---------|----------|----------|----------|---------|
| 4600 | 252.51  | 823.061 | 613.572 | 963.649  | -214.822 | 1285.356 | -14.596 |
| 4700 | 252.723 | 828.494 | 618.087 | 988.911  | -214.422 | 1317.966 | -14.648 |
| 4800 | 252.923 | 833.817 | 622.526 | 1014.194 | -214.089 | 1350.562 | -14.697 |
| 4900 | 253.112 | 839.034 | 626.892 | 1039.495 | -213.838 | 1383.166 | -14.745 |
| 5000 | 253.29  | 844.149 | 631.186 | 1064.816 | -213.652 | 1415.751 | -14.79  |
| 5100 | 253.458 | 849.166 | 635.411 | 1090.153 | -213.547 | 1448.34  | -14.834 |
| 5200 | 253.616 | 854.09  | 639.569 | 1115.507 | -213.508 | 1480.908 | -14.876 |
| 5300 | 253.766 | 858.922 | 643.662 | 1140.876 | -213.547 | 1513.503 | -14.916 |
| 5400 | 253.908 | 863.667 | 647.693 | 1166.26  | -213.659 | 1546.081 | -14.955 |
| 5500 | 254.043 | 868.327 | 651.662 | 1191.657 | -213.836 | 1578.668 | -14.993 |
| 5600 | 254.171 | 872.906 | 655.572 | 1217.068 | -214.085 | 1611.269 | -15.029 |
| 5700 | 254.292 | 877.405 | 659.424 | 1242.491 | -214.403 | 1643.869 | -15.064 |
| 5800 | 254.407 | 881.829 | 663.221 | 1267.926 | -214.791 | 1676.478 | -15.098 |
| 5900 | 254.517 | 886.179 | 666.963 | 1293.373 | -215.24  | 1709.07  | -15.131 |
| 6000 | 254.622 | 890.457 | 670.653 | 1318.83  | -215.76  | 1741.709 | -15.163 |

Enthalpy Reference Temperature =  $T_r = 298.15$  K

Standard State Pressure =  $p^\circ = 0.1$  MPa

**P2**

| $T/K$  | $J \cdot K^{-1} \cdot mol^{-1}$ |           |                               | $kJ \cdot mol^{-1}$ |                    |                    | $\log K_f$ |
|--------|---------------------------------|-----------|-------------------------------|---------------------|--------------------|--------------------|------------|
|        | $C_p^\circ$                     | $S^\circ$ | $-[G^\circ - H^\circ(T_r)]/T$ | $H - H^\circ(T_r)$  | $\Delta_f H^\circ$ | $\Delta_f G^\circ$ |            |
| 0      | 0                               | 0         | inf                           | -18.277             | -404.714           | -404.714           | inf        |
| 100    | 49.333                          | 255.316   | 397.079                       | -14.176             | -411.208           | -390.215           | 203.828    |
| 200    | 70.666                          | 295.431   | 336.77                        | -8.268              | -416.358           | -367.168           | 95.894     |
| 298.15 | 98.054                          | 328.7     | 328.7                         | 0                   | -420.6             | -342.018           | 59.92      |
| 300    | 98.571                          | 329.309   | 328.702                       | 0.182               | -420.669           | -341.597           | 59.477     |
| 400    | 124.626                         | 361.334   | 332.892                       | 11.377              | -423.835           | -314.731           | 41.1       |
| 500    | 145.972                         | 391.526   | 341.633                       | 24.947              | -426.003           | -287.186           | 30.002     |
| 600    | 162.905                         | 419.697   | 352.324                       | 40.423              | -427.437           | -259.278           | 22.572     |
| 700    | 176.423                         | 445.861   | 363.841                       | 57.414              | -428.296           | -231.175           | 17.25      |
| 800    | 187.394                         | 470.16    | 375.631                       | 75.623              | -428.681           | -202.987           | 13.254     |
| 900    | 196.439                         | 492.771   | 387.405                       | 94.829              | -428.672           | -174.769           | 10.143     |
| 1000   | 203.985                         | 513.87    | 399.008                       | 114.861             | -428.333           | -146.576           | 7.656      |
| 1100   | 210.336                         | 533.618   | 410.358                       | 135.586             | -427.726           | -118.426           | 5.624      |
| 1200   | 215.72                          | 552.157   | 421.41                        | 156.896             | -426.899           | -90.343            | 3.933      |
| 1300   | 220.31                          | 569.61    | 432.145                       | 178.704             | -425.904           | -62.337            | 2.505      |
| 1400   | 224.244                         | 586.084   | 442.558                       | 200.937             | -424.779           | -34.405            | 1.284      |
| 1500   | 227.632                         | 601.674   | 452.65                        | 223.535             | -423.556           | -6.569             | 0.229      |
| 1600   | 230.564                         | 616.46    | 462.431                       | 246.448             | -422.265           | 21.191             | -0.692     |
| 1700   | 233.113                         | 630.517   | 471.908                       | 269.635             | -420.932           | 48.864             | -1.501     |
| 1800   | 235.34                          | 643.905   | 481.094                       | 293.06              | -419.576           | 76.461             | -2.219     |
| 1900   | 237.292                         | 656.683   | 490.002                       | 316.694             | -418.212           | 103.981            | -2.859     |
| 2000   | 239.011                         | 668.899   | 498.644                       | 340.51              | -416.854           | 131.428            | -3.433     |
| 2100   | 240.532                         | 680.598   | 507.032                       | 364.489             | -415.522           | 158.806            | -3.95      |
| 2200   | 241.882                         | 691.819   | 515.178                       | 388.611             | -414.218           | 186.128            | -4.419     |
| 2300   | 243.085                         | 702.599   | 523.094                       | 412.861             | -412.949           | 213.393            | -4.846     |
| 2400   | 244.16                          | 712.967   | 530.791                       | 437.224             | -411.728           | 240.595            | -5.236     |
| 2500   | 245.125                         | 722.954   | 538.279                       | 461.689             | -410.555           | 267.75             | -5.594     |



|      |         |         |         |          |          |          |         |
|------|---------|---------|---------|----------|----------|----------|---------|
| 2600 | 245.994 | 732.585 | 545.568 | 486.246  | -409.438 | 294.86   | -5.924  |
| 2700 | 246.778 | 741.884 | 552.668 | 510.885  | -408.379 | 321.927  | -6.228  |
| 2800 | 247.489 | 750.872 | 559.587 | 535.599  | -407.382 | 348.958  | -6.51   |
| 2900 | 248.134 | 759.568 | 566.334 | 560.38   | -406.452 | 375.951  | -6.772  |
| 3000 | 248.721 | 767.99  | 572.916 | 585.224  | -405.584 | 402.92   | -7.015  |
| 3100 | 249.258 | 776.155 | 579.341 | 610.123  | -404.791 | 429.848  | -7.243  |
| 3200 | 249.748 | 784.076 | 585.616 | 635.074  | -404.065 | 456.767  | -7.456  |
| 3300 | 250.199 | 791.768 | 591.747 | 660.071  | -403.41  | 483.655  | -7.656  |
| 3400 | 250.612 | 799.244 | 597.74  | 685.112  | -402.829 | 510.53   | -7.843  |
| 3500 | 250.994 | 806.514 | 603.602 | 710.193  | -402.321 | 537.393  | -8.02   |
| 3600 | 251.346 | 813.59  | 609.337 | 735.31   | -401.886 | 564.23   | -8.187  |
| 3700 | 251.671 | 820.481 | 614.951 | 760.461  | -401.524 | 591.062  | -8.344  |
| 3800 | 251.973 | 827.197 | 620.448 | 785.643  | -401.241 | 617.886  | -8.493  |
| 3900 | 252.253 | 833.745 | 625.834 | 810.855  | -401.031 | 644.697  | -8.635  |
| 4000 | 252.514 | 840.135 | 631.112 | 836.093  | -400.896 | 671.503  | -8.769  |
| 4100 | 252.756 | 846.373 | 636.286 | 861.357  | -400.842 | 698.322  | -8.897  |
| 4200 | 252.982 | 852.467 | 641.361 | 886.644  | -400.862 | 725.128  | -9.018  |
| 4300 | 253.194 | 858.422 | 646.34  | 911.953  | -400.961 | 751.943  | -9.134  |
| 4400 | 253.391 | 864.245 | 651.227 | 937.282  | -401.137 | 778.756  | -9.245  |
| 4500 | 253.577 | 869.942 | 656.024 | 962.631  | -401.387 | 805.56   | -9.351  |
| 4600 | 253.751 | 875.517 | 660.735 | 987.997  | -401.721 | 832.396  | -9.452  |
| 4700 | 253.914 | 880.976 | 665.363 | 1013.381 | -402.135 | 859.233  | -9.549  |
| 4800 | 254.067 | 886.323 | 669.911 | 1038.78  | -402.622 | 886.075  | -9.642  |
| 4900 | 254.212 | 891.564 | 674.381 | 1064.194 | -403.196 | 912.939  | -9.732  |
| 5000 | 254.348 | 896.701 | 678.776 | 1089.622 | -403.842 | 939.795  | -9.818  |
| 5100 | 254.477 | 901.739 | 683.099 | 1115.063 | -404.573 | 966.681  | -9.901  |
| 5200 | 254.598 | 906.682 | 687.351 | 1140.517 | -405.38  | 993.557  | -9.98   |
| 5300 | 254.713 | 911.532 | 691.536 | 1165.983 | -406.27  | 1020.478 | -10.057 |
| 5400 | 254.822 | 916.294 | 695.654 | 1191.459 | -407.244 | 1047.397 | -10.132 |
| 5500 | 254.925 | 920.971 | 699.708 | 1216.947 | -408.292 | 1074.344 | -10.203 |
| 5600 | 255.023 | 925.565 | 703.7   | 1242.444 | -409.421 | 1101.313 | -10.273 |
| 5700 | 255.115 | 930.08  | 707.632 | 1267.951 | -410.631 | 1128.301 | -10.34  |
| 5800 | 255.203 | 934.518 | 711.506 | 1293.467 | -411.925 | 1155.323 | -10.405 |
| 5900 | 255.287 | 938.881 | 715.323 | 1318.992 | -413.293 | 1182.335 | -10.468 |
| 6000 | 255.367 | 943.172 | 719.085 | 1344.524 | -414.749 | 1209.412 | -10.529 |

**Table S2: NASA polynomials coefficients for the species involved in various pathways of glycerol carbonate decomposition.**

```

THERMO
GC      H   6C   4O   4   0g   300.00  5000.00 1000.00  1
14.7974  0.02415      -9.54E-06  1.72E-09  -1.16E-13  2
-91450.8967 -51.55165 -1.57129  0.06316  -3.29E-05  3
-5.61E-09  7.90E-12  -86582.5811  34.61705  4

P1a     H   6C   3O   2   0g   300.00  5000.00 1000.00  1
9.62449  0.02012      -7.85E-06  1.40E-09  -9.44E-14  2
-45900.8237 -25.11901  0.83967  0.03697  -8.53E-06  3
-1.45E-08  8.36E-12  -43048.6018  22.21815  4

P1b     H   6C   3O   2   0g   300.00  5000.00 1000.00  1
9.71496  0.01992      -7.74E-06  1.38E-09  -9.27E-14  2
-34342.6934 -27.09723 -1.24334  0.04489  -1.92E-05  3
-8.74E-09  7.41E-12  -31041.8017  30.83064  4

P2      H   4C   4O   3   0g   300.00  5000.00 1000.00  1
12.7203  0.01773      -7.06E-06  1.28E-09  -8.69E-14  2
-56292.188 -40.6486  -2.28374  0.06108  -5.25E-05  3
2.04E-08  -2.17E-12  -52197.3278  36.49176  4
END

```

**Table S3:** Calculated MP2/cc-pVTZ scaled harmonic vibrational wavenumbers (scaling factor = 0.95) and rotational constants of the species involved in various pathways of glycerol carbonate decomposition. Imaginary wavenumber is denoted by *i*. Frequencies corresponding to the torsional modes are shown in bold.

| Species | Rotational Constants / | Wavenumbers / cm <sup>-1</sup> |
|---------|------------------------|--------------------------------|
|---------|------------------------|--------------------------------|

|                  | GHZ                             |                                                                                                                                                                                                                                                                                                |
|------------------|---------------------------------|------------------------------------------------------------------------------------------------------------------------------------------------------------------------------------------------------------------------------------------------------------------------------------------------|
| GC               | 4.1579<br>1.57017<br>1.37869    | 61.1, <b>120.1</b> , 186.2, 257.4, 275.9, <b>390.3</b> , 511.0, 597.6, 644.5, 691.2, 738.2, 833.0, 868.4, 910.4, 955.2, 1037.1, 1055.7, 1070.1, 1095.5, 1116.8, 1181.8, 1200.5, 1293.0, 1304.5, 1334.5, 1355.7, 1365.0, 1434.9, 1460.7, 1809.7, 2921.3, 2948.0, 2966.2, 2987.7, 3036.4, 3640.5 |
| TS1a             | 3.17406<br>1.67965<br>1.60695   | 826.9i, 65.0, 97.2, <b>179.6</b> , 225.9, 279.4, 315.5, 382.3, 412.6, 466.8, 600.1, <b>646.7</b> , 721.1, 790.7, 818.6, 842.0, 934.7, 995.6, 1035.0, 1130.2, 1179.2, 1203.0, 1217.6, 1262.5, 1299.7, 1366.3, 1398.3, 1408.6, 1450.8, 2085.7, 2267.3, 2867.8, 2893.2, 2906.7, 3029.4, 3221.9    |
| TS1b             | 4.659<br>1.28894<br>1.13437     | 820.3i, 62.5, 94.1, <b>129.4</b> , 204.0, 249.3, 358.7, 431.7, 463.8, <b>517.0</b> , 591.9, 639.0, 707.2, 799.4, 844.9, 869.3, 946.4, 969.4, 1054.3, 1081.5, 1149.2, 1178.0, 1212.4, 1224.1, 1295.7, 1352.3, 1359.6, 1431.1, 1455.3, 1931.9, 2914.2, 2987.5, 2995.2, 3061.4, 3178.5, 3615.2    |
| TS2              | 4.93387<br>1.31756<br>1.13236   | -, 92.3, <b>107.6</b> , 172.3, 304.7, 359.9, 421.5, <b>449.2</b> , 510.1, 587.1, 682.2, 735.8, 754.5, 788.8, 851.2, 871.6, 931.7, 970.1, 1005.9, 1056.9, 1081.1, 1131.9, 1155.5, 1174.6, 1303.8, 1341.5, 1380.1, 1420.6, 1456.0, 1760.6, 1797.8, 2938.3, 2983.2, 3004.7, 3086.7, 3528.6        |
| P1a              | 8.63383<br>4.21656<br>3.16593   | 132.3, 174.3, 243.5, 380.0, 494.0, 607.5, 739.6, 826.4, 914.1, 924.5, 1045.5, 1063.6, 1165.6, 1195.9, 1317.2, 1333.2, 1356.3, 1358.4, 1378.1, 1445.7, 1674.0, 2827.1, 2910.8, 2914.9, 2961.3, 2994.7, 3628.4 ,                                                                                 |
| P1b              | 10.35052<br>4.18933<br>3.85259  | 155.8, 247.7, 338.2, 454.2, 597.5, 741.6, 820.8, 887.6, 938.3, 996.5, 1059.4, 1082.2, 1110.6, 1117.0, 1173.0, 1230.5, 1306.2, 1362.7, 1384.2, 1445.7, 1460.9, 2897.1, 2980.1, 3004.1, 3018.0, 3105.7, 3604.8                                                                                   |
| P2               | 6.55922<br>2.39031<br>1.77149   | 63.0, 162.9, 308.9, 458.8, 522.5, 610.0, 696.4, 704.1, 730.6, 808.8, 841.0, 866.0, 958.2, 994.4, 1064.5, 1085.6, 1167.0, 1261.4, 1316.0, 1370.5, 1454.0, 1664.8, 1827.4, 2957.4, 3011.9, 3056.2, 3156.2                                                                                        |
| CO <sub>2</sub>  | 11.55316                        | 623.0, 623.0, 1265.4, 2304.7                                                                                                                                                                                                                                                                   |
| H <sub>2</sub> O | 801.1297<br>441.8747<br>284.793 | 1569.5, 3662.6, 3776.9                                                                                                                                                                                                                                                                         |

**Table S4** Calculated MP2/cc-pVTZ geometries in cartesian coordinates of the stationary points for the decomposition pathway of glycerol carbonates

| Species         | Cartesian coordinates / Å |             |           |          |
|-----------------|---------------------------|-------------|-----------|----------|
| CO <sub>2</sub> | C                         | 0.949700328 | -0.043668 | 0.012432 |
|                 | O                         | 2.119071291 | -0.043668 | 0.012432 |

|                       |           |              |              |              |
|-----------------------|-----------|--------------|--------------|--------------|
|                       | O         | -0.219670618 | -0.043668    | 0.012432     |
| <b>H<sub>2</sub>O</b> | O         | 0.126692761  | -1.656858743 | -0.085703    |
|                       | H         | 1.084461305  | -1.606815663 | -0.085703    |
|                       | H         | -0.145844066 | -0.737321594 | -0.085703    |
| <b>GC</b>             | C         | 0.411970597  | -1.239645469 | -0.056557934 |
|                       | C         | 1.933233715  | -1.252889009 | 0.032743088  |
|                       | H         | 0.020551651  | -1.927842219 | -0.798491434 |
|                       | H         | -0.042099842 | -1.421044632 | 0.914981952  |
|                       | H         | 2.394287517  | -1.637858793 | -0.877907172 |
|                       | O         | 0.108341256  | 0.096793182  | -0.47048639  |
|                       | O         | 2.254606678  | 0.141010455  | 0.145677405  |
|                       | C         | 1.18016261   | 0.890706613  | -0.236635629 |
|                       | O         | 1.193032137  | 2.077264347  | -0.34729281  |
|                       | C         | 2.482846874  | -1.966654115 | 1.248517837  |
|                       | H         | 2.205305128  | -3.019111928 | 1.20058487   |
|                       | H         | 3.573125398  | -1.903631169 | 1.237328118  |
|                       | O         | 1.941123174  | -1.452206803 | 2.446391976  |
|                       | H         | 2.223515107  | -0.53289246  | 2.506149122  |
| <b>P1a</b>            | C         | 0.067901469  | 0.527093552  | -1.148000854 |
|                       | C         | -1.248070241 | -0.193212311 | -1.108513749 |
|                       | H         | 0.457477848  | 0.771253079  | -2.151238307 |
|                       | H         | -1.996744581 | 0.467298426  | -1.554585588 |
|                       | H         | -1.176317743 | -1.064948473 | -1.765072151 |
|                       | O         | 0.698275656  | 0.846686059  | -0.15686271  |
|                       | C         | -1.657971674 | -0.585605881 | 0.300331011  |
|                       | H         | -2.604732622 | -1.119968369 | 0.273298981  |
|                       | H         | -0.906630524 | -1.257475707 | 0.72382162   |
|                       | O         | -1.856746436 | 0.546299935  | 1.126427981  |
|                       | H         | -0.985185151 | 0.947114691  | 1.221255765  |
| <b>P1b</b>            | C         | 0.244409959  | 1.188988485  | -0.082548967 |
|                       | C         | 0.836098517  | 0.208944154  | 0.822783116  |
|                       | H         | -0.505831194 | 1.871840152  | 0.291581722  |
|                       | H         | 0.813532011  | 1.50753185   | -0.94409756  |
|                       | H         | 0.509049118  | 0.196227686  | 1.856674598  |
|                       | O         | -0.1726368   | -0.194345255 | -0.118617251 |
|                       | C         | 2.193807772  | -0.381793856 | 0.549743194  |
|                       | H         | 2.963808439  | 0.229029636  | 1.019157005  |
|                       | H         | 2.238086273  | -1.380581345 | 0.995373342  |
|                       | O         | 2.474035296  | -0.425438994 | -0.832942877 |
|                       | H         | 1.68019261   | -0.795202513 | -1.240178322 |
|                       | <b>P2</b> | C            | 0.064121276  | 1.349589812  |
| C                     |           | -0.587560764 | -0.004970487 | -0.085610384 |
| H                     |           | -0.129578858 | 1.911441358  | -0.98993685  |

|             |   |              |              |              |
|-------------|---|--------------|--------------|--------------|
|             | H | -0.21474403  | 1.944051809  | 0.787651972  |
|             | O | 1.458789576  | 1.046366505  | -0.006841167 |
|             | O | 0.423472143  | -0.936466821 | -0.020615564 |
|             | C | 1.637351407  | -0.294172753 | 0.025851506  |
|             | O | 2.685435218  | -0.85190016  | 0.086023351  |
|             | C | -1.870852197 | -0.33678602  | -0.140623739 |
|             | H | -2.176330345 | -1.370084169 | -0.136422491 |
|             | H | -2.615934425 | 0.440388928  | -0.190161235 |
| <hr/>       |   |              |              |              |
| <b>TS1a</b> | C | -0.226114396 | 0.669670691  | -1.234271709 |
|             | C | -0.861728311 | -0.554310714 | -0.863453787 |
|             | H | 0.24085132   | 0.668789819  | -2.224852922 |
|             | H | -1.35388638  | 0.948976087  | -1.475813779 |
|             | H | -1.034448186 | -1.305809572 | -1.630469238 |
|             | O | 0.354789223  | 1.350416183  | -0.263250665 |
|             | O | 1.004211227  | -1.072971766 | 0.079402061  |
|             | C | 1.492367377  | -0.064357395 | 0.53735927   |
|             | O | 2.266012569  | 0.526828631  | 1.196893369  |
|             | C | -1.647523145 | -0.692158695 | 0.382615808  |
|             | H | -2.687757595 | -0.854516662 | 0.069769414  |
|             | H | -1.326738686 | -1.635848376 | 0.842609562  |
|             | O | -1.586318157 | 0.393098539  | 1.253585694  |
|             | H | -0.839200861 | 0.956772232  | 0.946712922  |
| <hr/>       |   |              |              |              |
| <b>TS1b</b> | C | 0.285334148  | 1.342686698  | -0.026937686 |
|             | C | 0.68269607   | 0.16803702   | 0.705153154  |
|             | H | -0.185505039 | 2.210304139  | 0.396537197  |
|             | H | 0.690453726  | 1.416001791  | -1.024520244 |
|             | H | 0.328698032  | 0.111321826  | 1.732326098  |
|             | O | -1.843733844 | 1.017541647  | 0.114279034  |
|             | O | -0.157942523 | -0.536635331 | -0.23004436  |
|             | C | -1.794370047 | -0.203780771 | -0.057309617 |
|             | O | -2.447115645 | -1.18823501  | -0.180949334 |
|             | C | 2.096496874  | -0.349433304 | 0.534285499  |
|             | H | 2.792958547  | 0.272929178  | 1.093240204  |
|             | H | 2.116547943  | -1.359811101 | 0.951378105  |
|             | O | 2.500901301  | -0.327829659 | -0.814258976 |
|             | H | 1.857196457  | -0.867046125 | -1.290550075 |
| <hr/>       |   |              |              |              |
| <b>TS2</b>  | C | 0.127108248  | 1.44008657   | -0.16997587  |
|             | C | -0.637624843 | 0.157929484  | -0.252187266 |
|             | H | 0.318369809  | 1.896561211  | -1.140548348 |
|             | H | -0.31174077  | 2.173239815  | 0.50260206   |
|             | H | -2.011665627 | -0.141644229 | -1.036056113 |
|             | O | 1.401520951  | 1.018866608  | 0.365241586  |
|             | O | 0.393709848  | -0.82543951  | -0.401707494 |
|             | C | 1.5487648    | -0.305429014 | 0.098594917  |

|   |              |              |              |
|---|--------------|--------------|--------------|
| O | 2.554743781  | -0.926269197 | 0.272304109  |
| C | -1.653132194 | -0.190021704 | 0.697328122  |
| H | -1.603200012 | -1.152296854 | 1.190376687  |
| H | -2.101691636 | 0.605303595  | 1.283899941  |
| O | -2.885428923 | -0.524512752 | -0.435907443 |
| H | -3.566685431 | 0.168955978  | -0.391428887 |

---
